# Supplementary material
Source: Research Square preprint supplement (doi:10.21203/rs.3.rs-10097142/v1)
Supplement: Supplementary file 1 [file 0cadb1271b5a2d896afdf9e7.docx]

**Supplementary Information**

**Fig. S1.
Quantification of magnesium and zinc contents in PMEZ and PMEZL scaffolds measured using inductively coupled plasma optical emission spectroscopy (ICP-OES).**

**
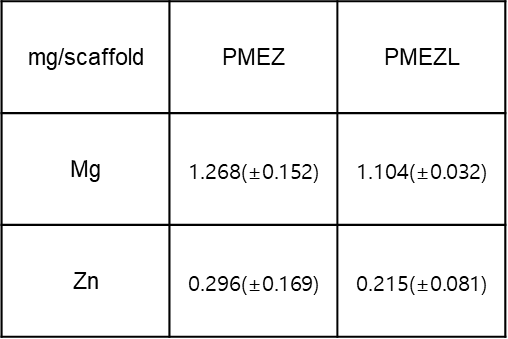
**

**Fig. S2.
Cell viability of HK2 cells exposed to various concentrations of H₂O₂ to establish the oxidative stress model.**

**Fig. S3.
Zeta potential and PDI of LNP, dEV, hEV determined with dynamic light scattering (DLS).**

**
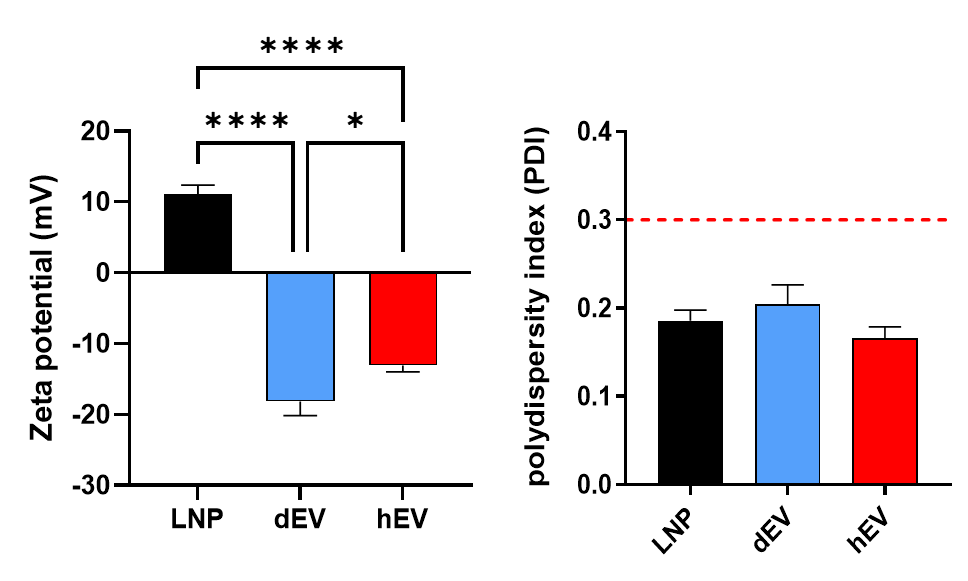
**

**Fig. S4.
Cell viability of HK2 cells treated with increasing concentrations of lactoferrin, as assessed by CCK-8 assay.**

**Fig. S5.
Temporal monitoring of HK2 cell metabolic activity and proliferation on various scaffolds at days 1, 5, and 7.**

**
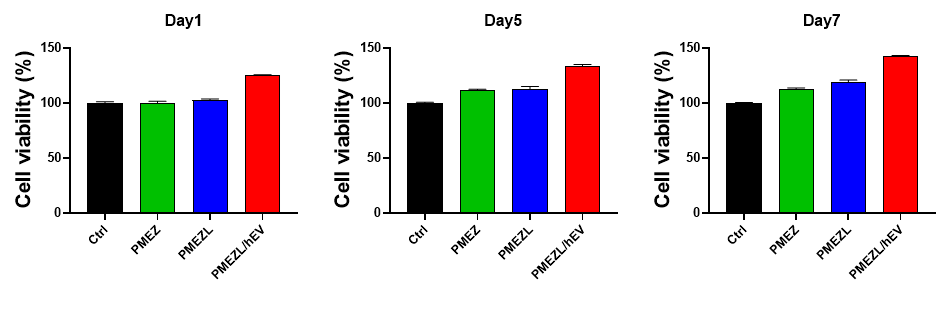
**
